# Supplementary figures and images for: Macrophage Migration Inhibitory Factor—An Innovative Indicator for Free Flap Ischemia after Microsurgical Reconstruction
Source: MDPI journal article supplement (doi:10.3390/healthcare9060616), 2021-05-21

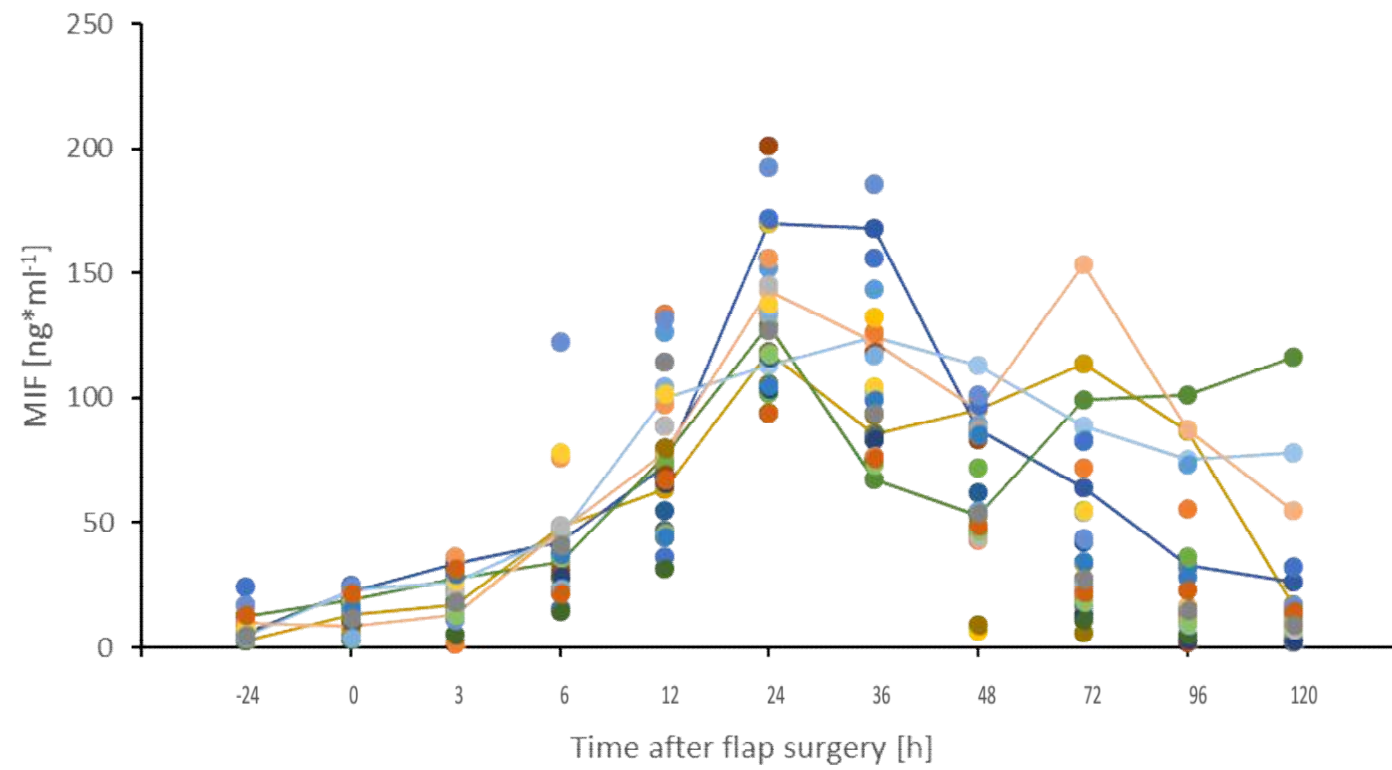

Supplement: s1 [file s1]
